# Supplementary material for: Plasminogen activation is required for the development of radiation-induced dermatitis
Source: PubMed Central journal article supplement (PMC6189099; doi:10.1038/s41419-018-1106-8), 2018-10-15
Supplement: 41419_2018_1106_MOESM1_ESM.pdf [file 41419_2018_1106_MOESM1_ESM.pdf]

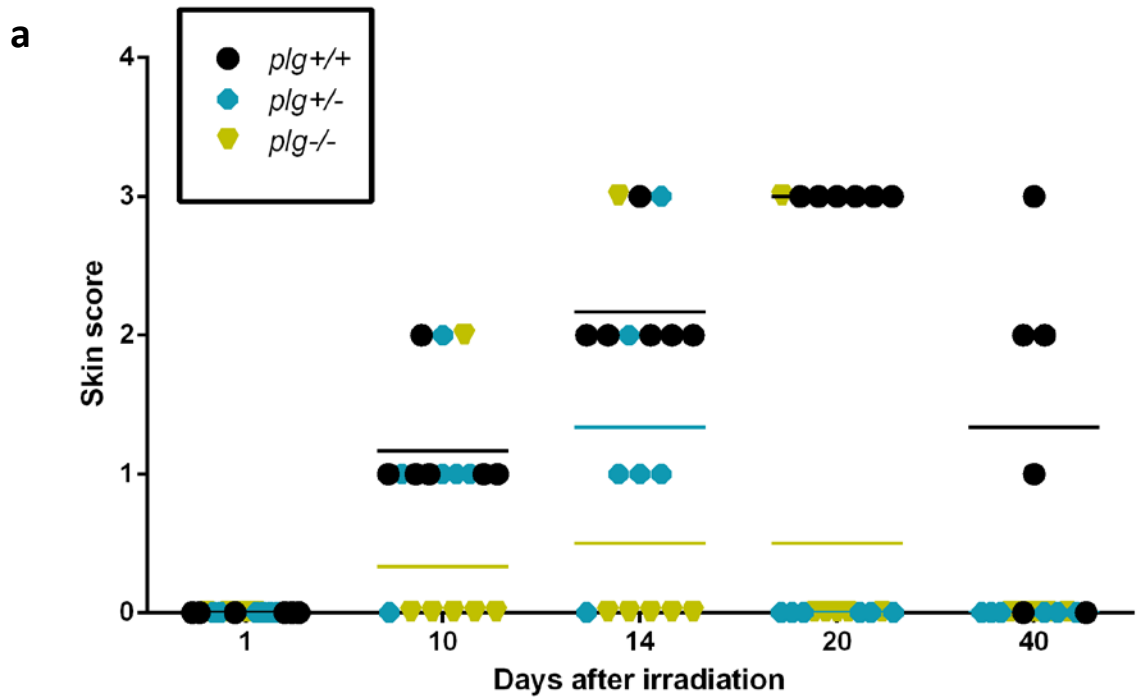

**b**

|                           | Day 10                    |                           |                           | Day 14                    |                           |                           | Day 20                    |                           |                           | Day 40                    |                           |                           |
|---------------------------|---------------------------|---------------------------|---------------------------|---------------------------|---------------------------|---------------------------|---------------------------|---------------------------|---------------------------|---------------------------|---------------------------|---------------------------|
|                           | <i>Plg</i> <sup>+/+</sup> | <i>Plg</i> <sup>+/-</sup> | <i>Plg</i> <sup>-/-</sup> | <i>Plg</i> <sup>+/+</sup> | <i>Plg</i> <sup>+/-</sup> | <i>Plg</i> <sup>-/-</sup> | <i>Plg</i> <sup>+/+</sup> | <i>Plg</i> <sup>+/-</sup> | <i>Plg</i> <sup>-/-</sup> | <i>Plg</i> <sup>+/+</sup> | <i>Plg</i> <sup>+/-</sup> | <i>Plg</i> <sup>-/-</sup> |
| <i>Plg</i> <sup>+/+</sup> | -                         | *                         | ns                        | -                         | *                         | ns                        | -                         | **                        | **                        | -                         | *                         | *                         |
| <i>Plg</i> <sup>+/-</sup> | *                         | -                         | ns                        | *                         | -                         | ns                        | **                        | -                         | ns                        | *                         | -                         | ns                        |
| <i>Plg</i> <sup>-/-</sup> | ns                        | ns                        | -                         | ns                        | ns                        | -                         | **                        | ns                        | -                         | *                         | ns                        | -                         |

**Supplementary Fig. 1. A comparison of the quality of dorsal skin in *plg*<sup>+/+</sup>, *plg*<sup>+/-</sup> and *plg*<sup>-/-</sup> mice at different days after irradiation.** (a) Skin scores for *plg*<sup>+/+</sup>, *plg*<sup>+/-</sup> and *plg*<sup>-/-</sup> mice at different days after irradiation. (b) Statistical analysis of skin scores between *plg*<sup>+/+</sup>, *plg*<sup>+/-</sup> and *plg*<sup>-/-</sup> mice at different days after irradiation. \* p<0.05, ns= not significant.

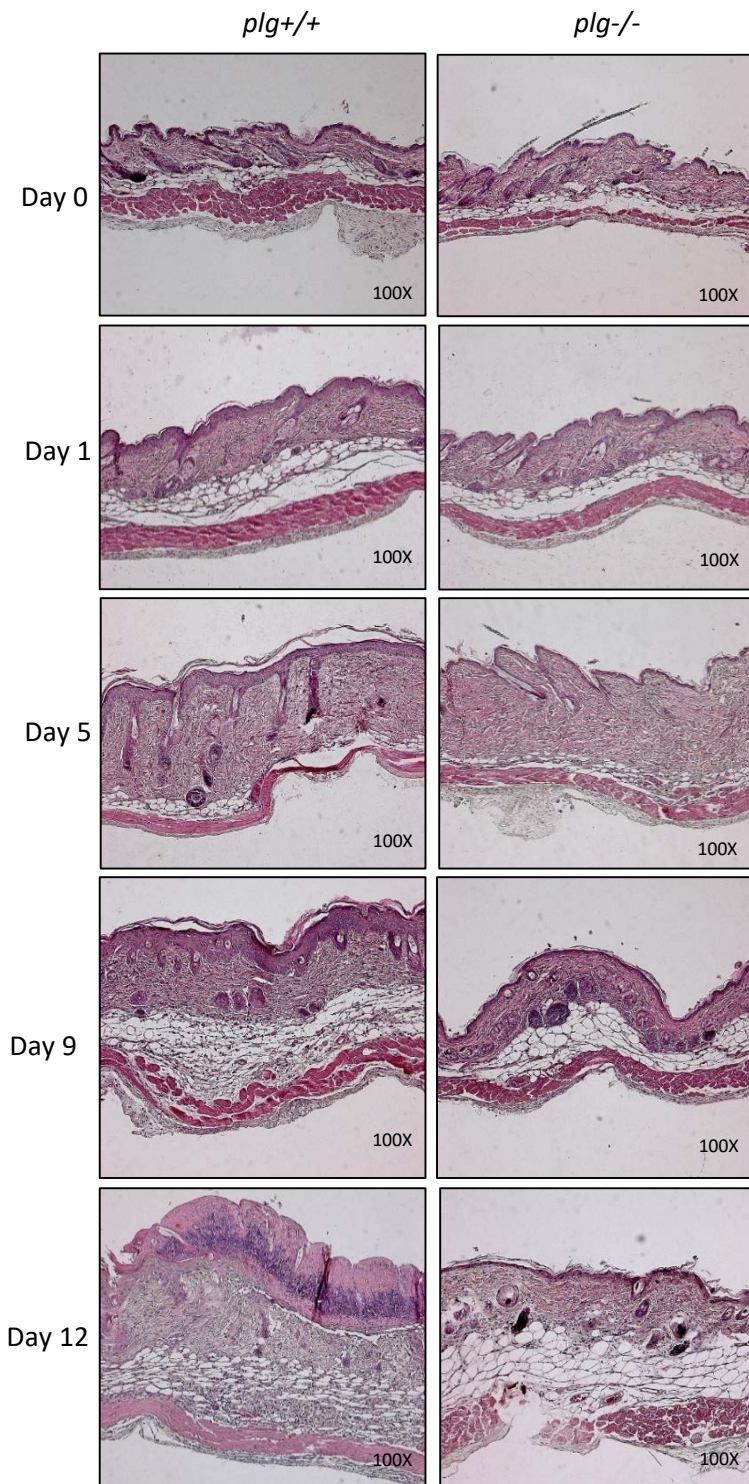

**Supplementary Fig. 2. The thickness of epidermis increases significantly after irradiation in *plg+/+* mice, but not in *plg-/-* mice.** Representative photographs of H&E stained skin sections from *plg+/+* and *plg-/-* mice at different days after irradiation. Magnification 100x.

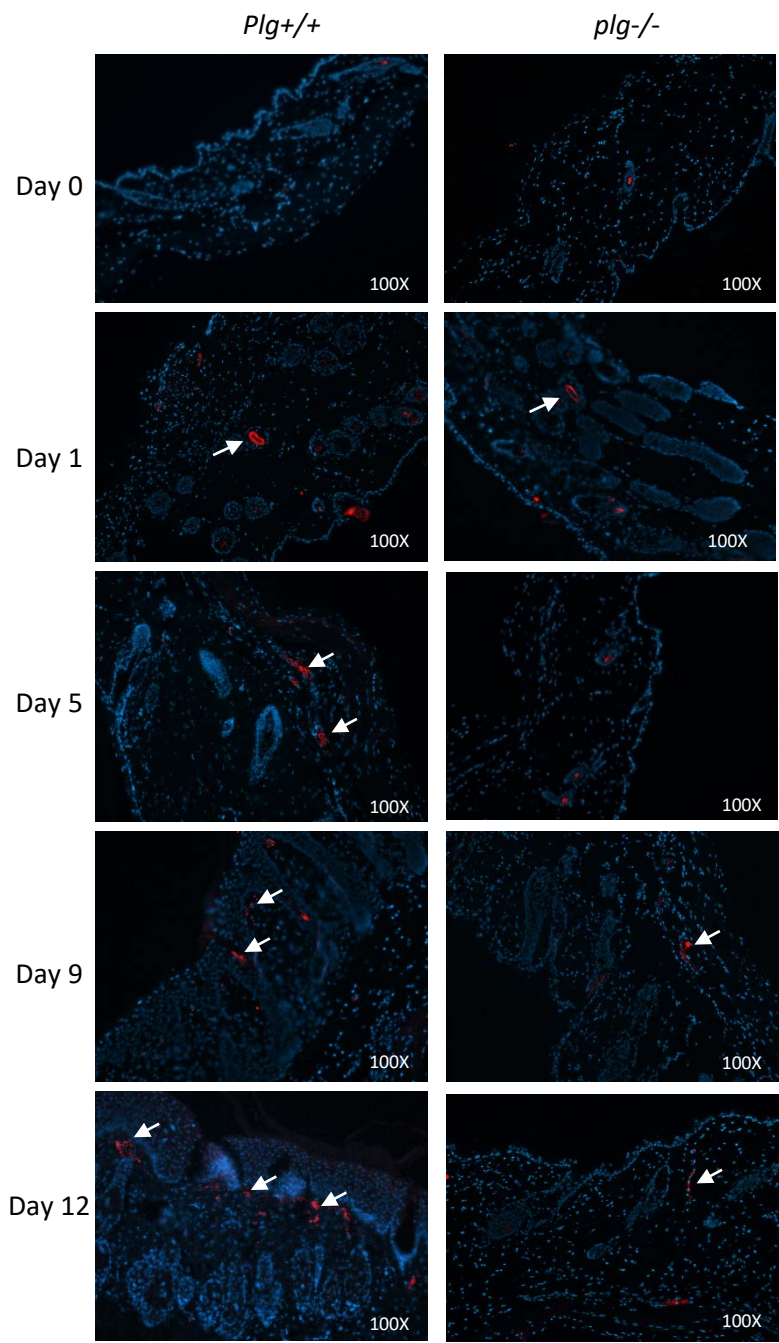

**Supplementary Fig. 3. The number of vessels increases significantly after irradiation in *plg+/+* mice, but not in *plg-/-* mice.** Representative photographs of CD31 (red) and DAPI (blue) staining of skin sections from *plg+/+* and *plg-/-* mice at different days after irradiation. Magnification 100x.

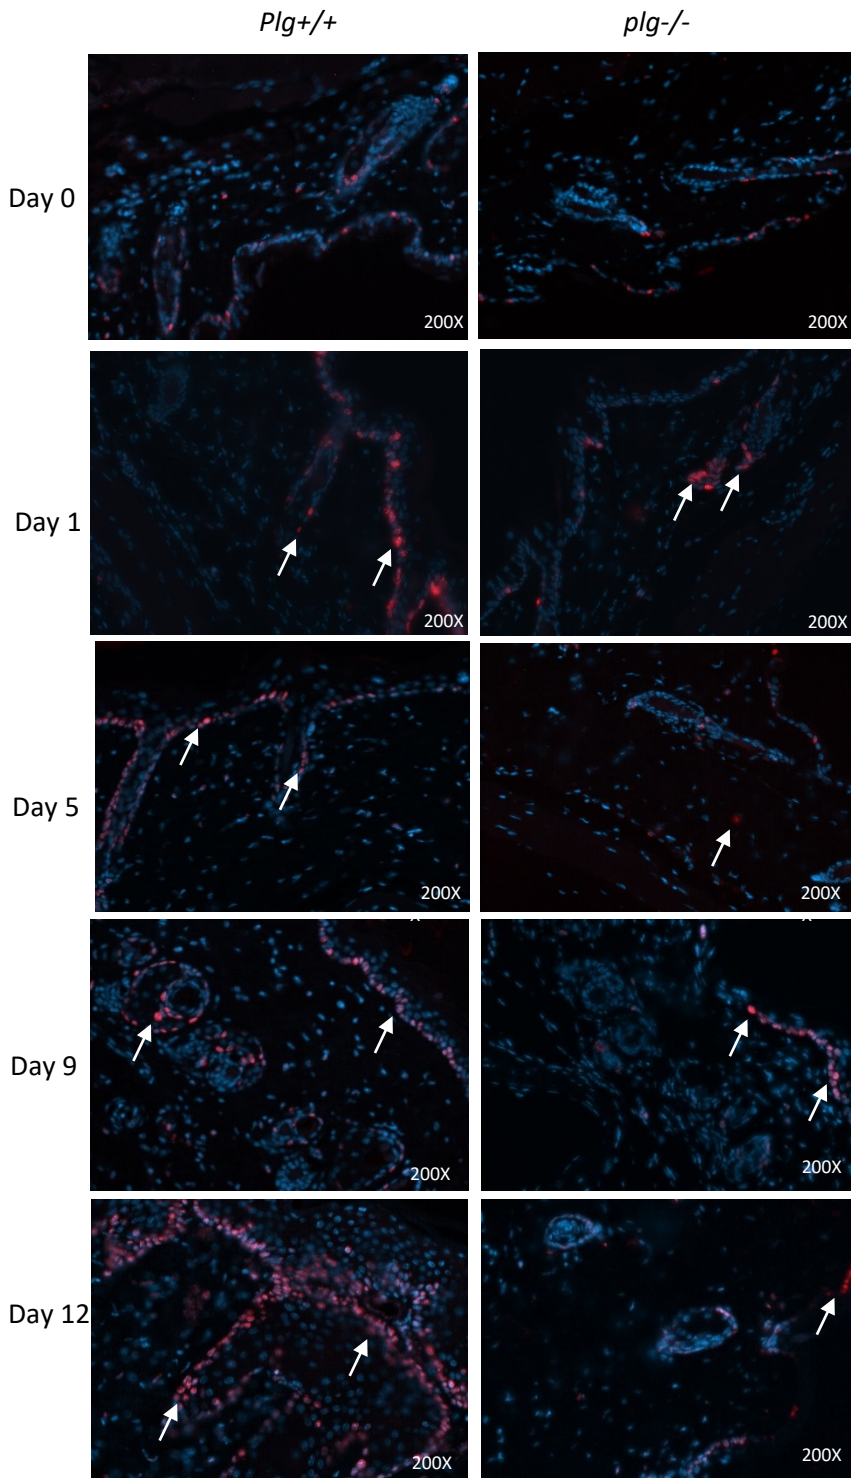

**Supplementary Fig. 4. The number of proliferating cells increases significantly after irradiation in *plg+/+* mice, but not in *plg-/-* mice.** Representative photographs of Ki67 (red) and DAPI (blue) staining of skin sections from *plg+/+* and *plg-/-* mice at different days after irradiation. Magnification 200x.

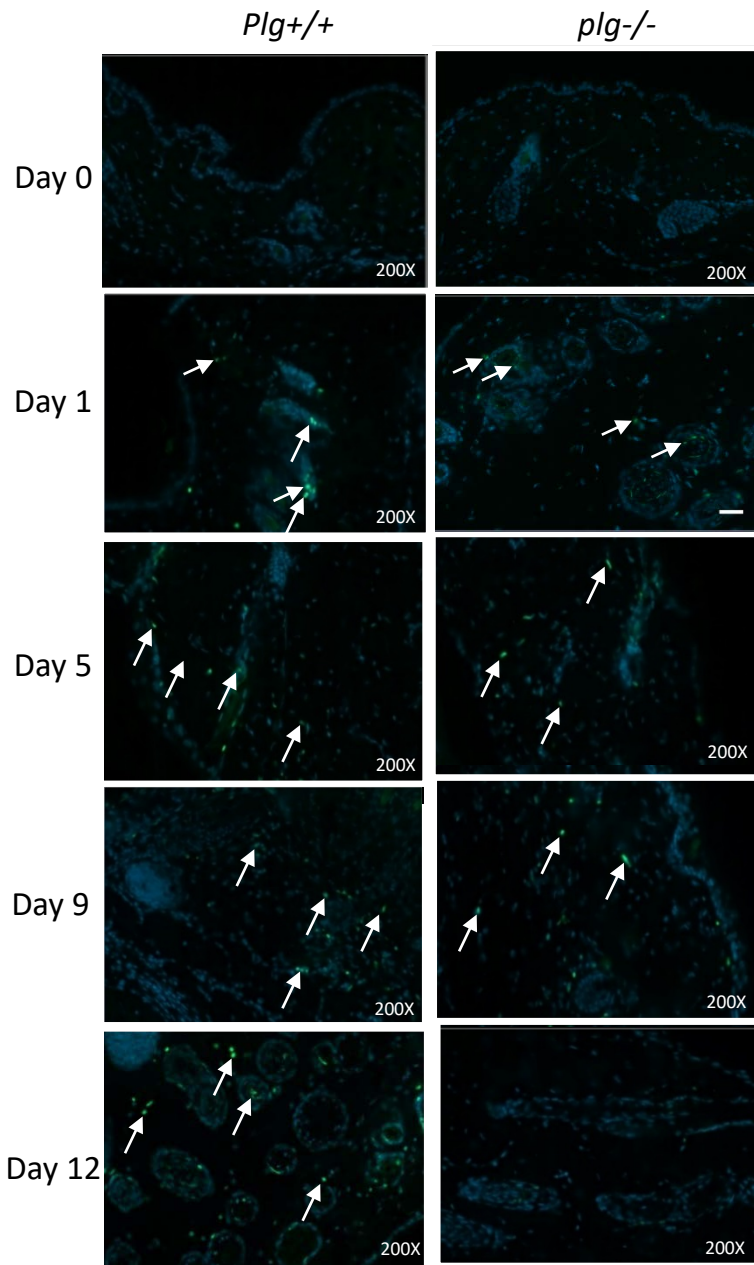

**Supplementary Fig. 5. Apoptosis in the skin of *plg+/+* and *plg-/-* mice after irradiation.** Representative photographs of TUNEL (green) and DAPI (blue) staining of skin sections from *plg+/+* and *plg-/-* mice at different days after irradiation. Magnification 200x.

# 8-oxo-dG

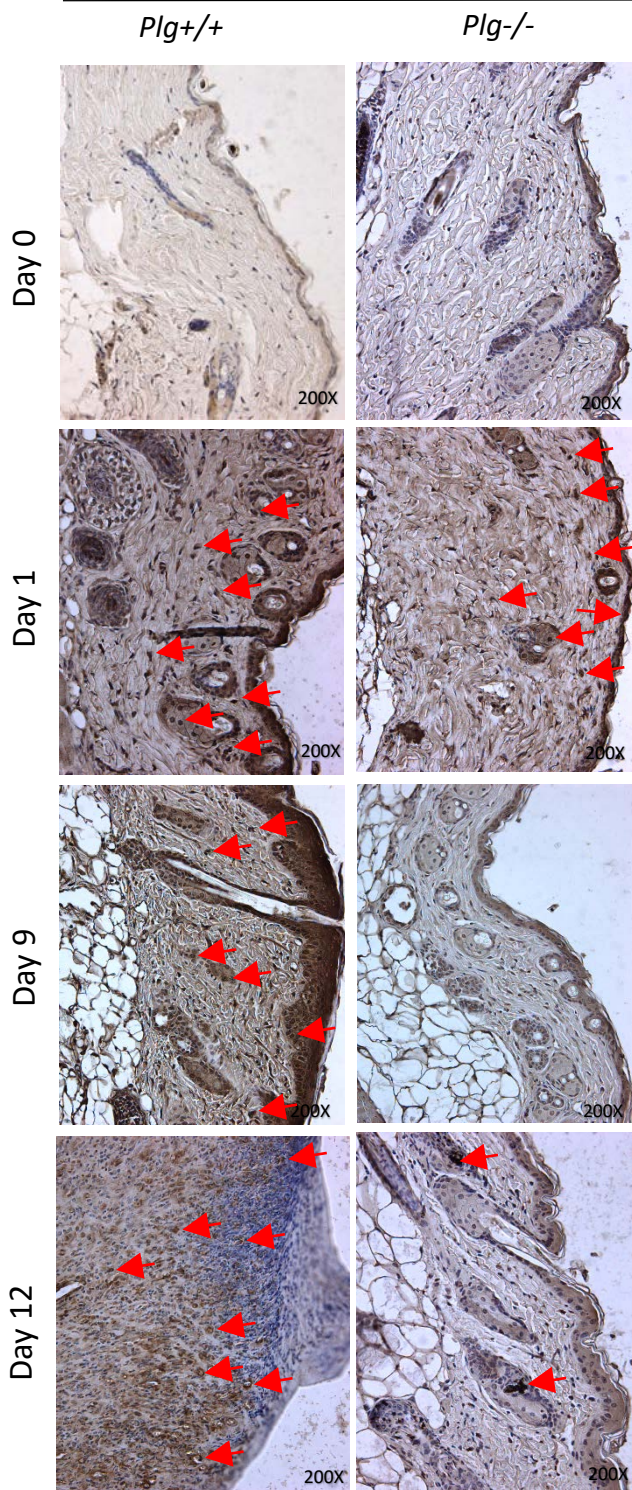

**Supplementary Fig. 6. Reactive oxygen species (ROS) in the skin of *plg+/+* and *plg-/-* mice after irradiation.** Representative photographs of 8-Oxo-2'-deoxyguanosine (brown) and Hematoxylin (purple) staining of skin sections from *plg+/+* and *plg-/-* mice at different days after irradiation. Magnification 200x.

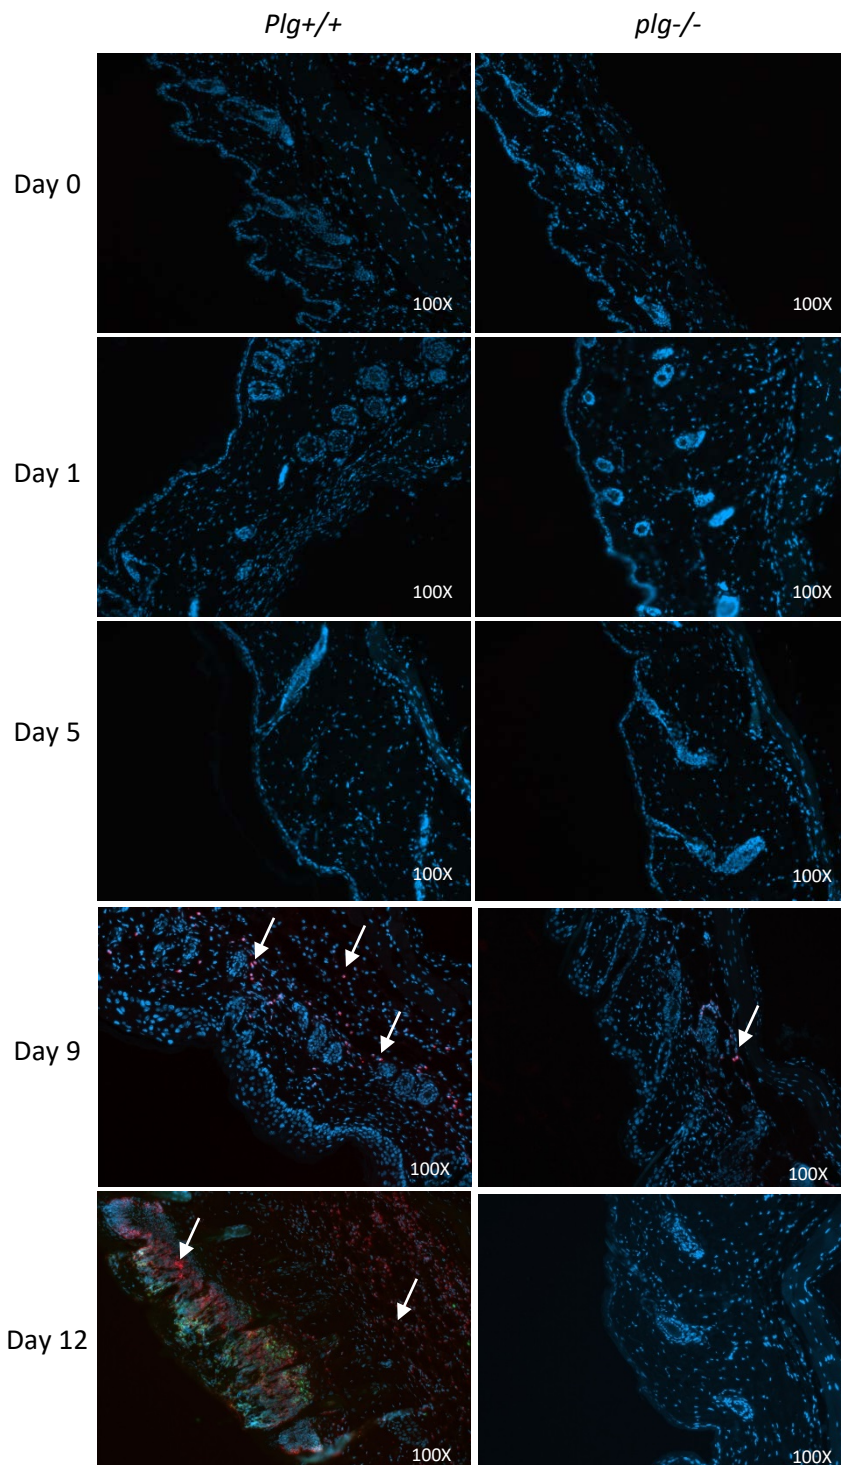

**Supplementary Fig. 7. Large numbers of neutrophils and NETs infiltrate irradiated skin in *plg+/+* mice, but not in *plg-/-* mice.** Representative photographs of immunostaining of neutrophils (red), DAPI (blue), and NETs (citrullinated histon 3, green) on skin sections from *plg+/+* and *plg-/-* mice at different days after irradiation. Magnification 100x.

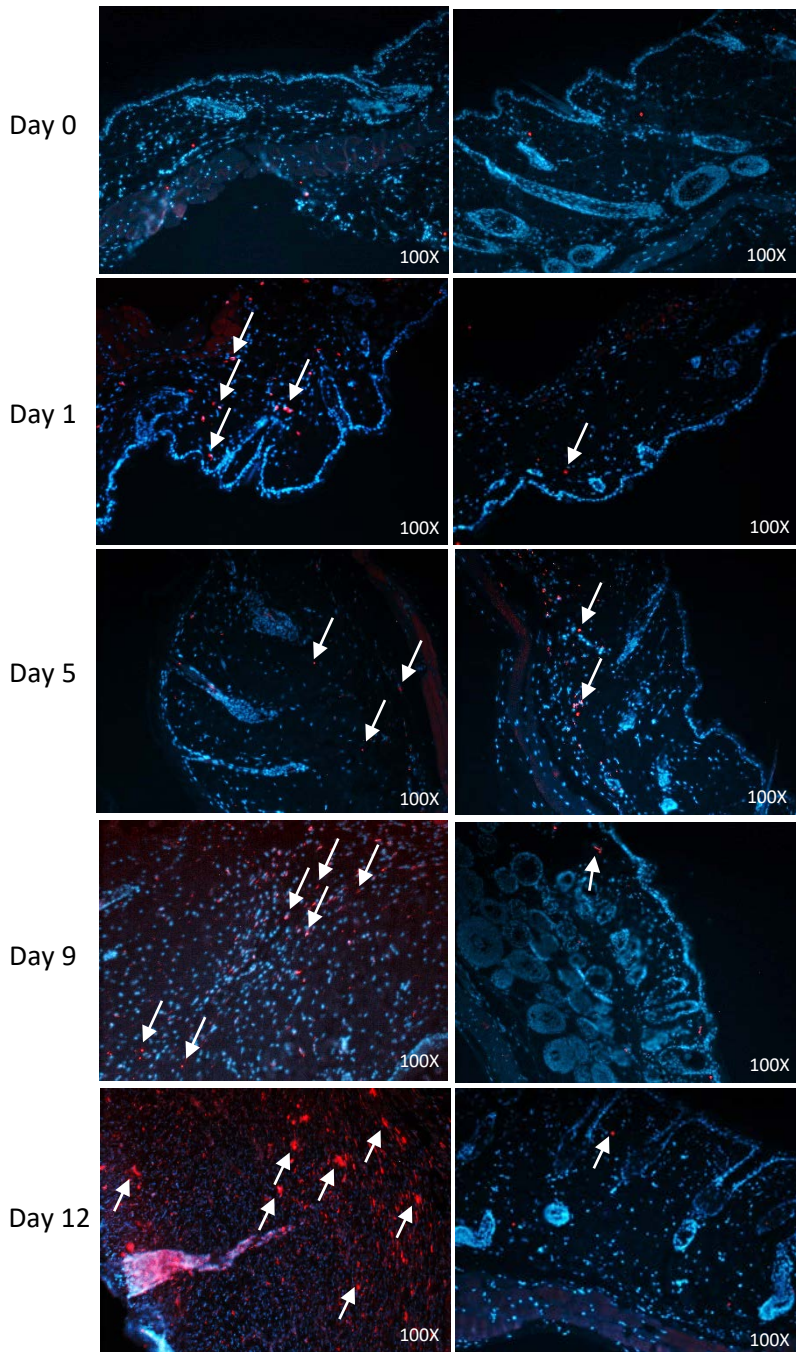

**Supplementary Fig. 8. Macrophage accumulation in the skin of *plg*<sup>+/+</sup> and *plg*<sup>-/-</sup> mice after irradiation.** Representative photographs of (CD68) (red) and DAPI (blue) staining of skin sections from *plg*<sup>+/+</sup> and *plg*<sup>-/-</sup> mice at different days after irradiation. Magnification 100x.



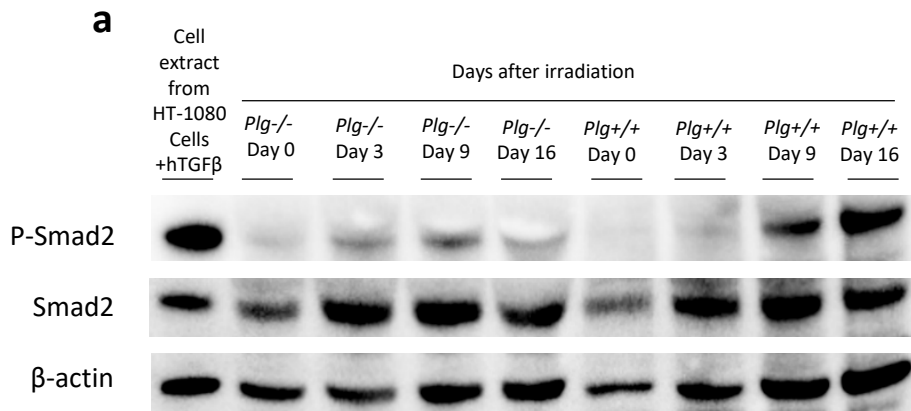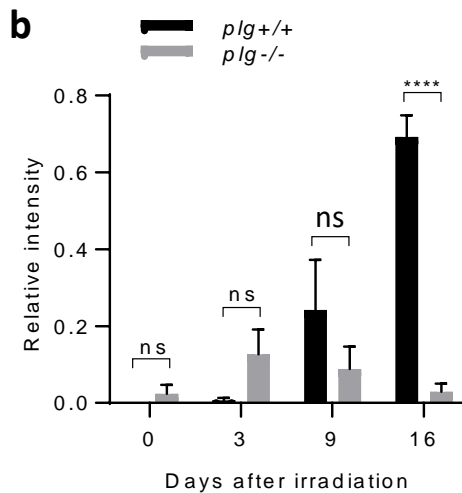

**Supplementary Fig. 9. Activation ( phosphorylation) of Smad2 in the skin of *plg*<sup>+/+</sup> and *plg*<sup>-/-</sup> mice after irradiation.** (a) Representative photograph of western blot of skin samples from *plg*<sup>+/+</sup> and *plg*<sup>-/-</sup> mice at different days after irradiation. β-actin was used as an internal control. HT-1080 cells induced by hTGFβ were used as control for P-Smad2 antibody. (b) Quantification of P-Smad2 from the band intensity (n = 4 per time point).

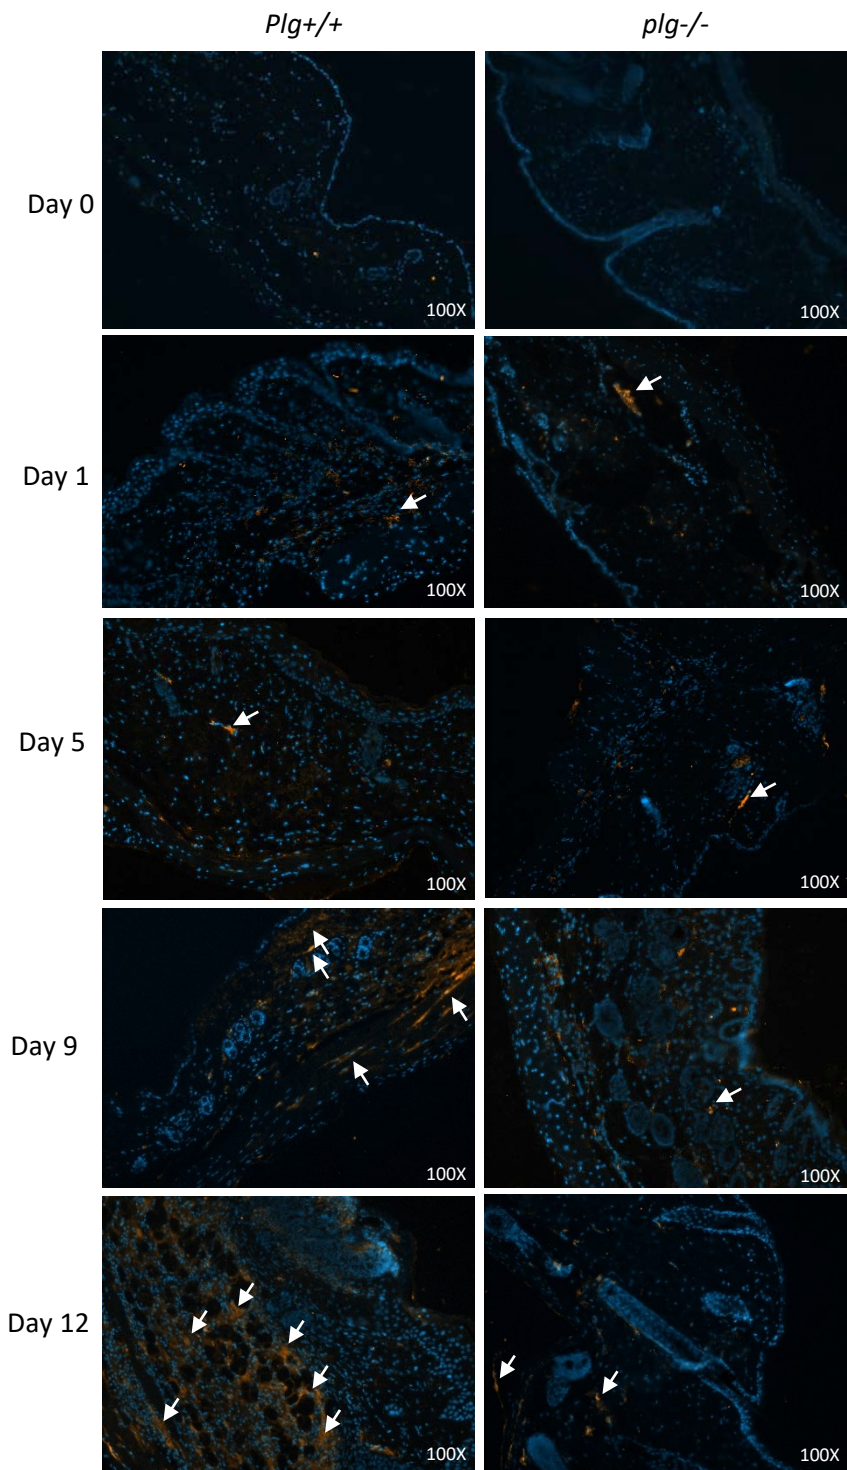

**Supplementary Fig. 10. Fibrin accumulation in the skin of *plg+/+* and *plg-/-* mice after irradiation.** Representative photographs of fibrin (orange) and DAPI (blue) staining of skin sections from *plg+/+* and *plg-/-* mice at different days after irradiation. Magnification 100x.

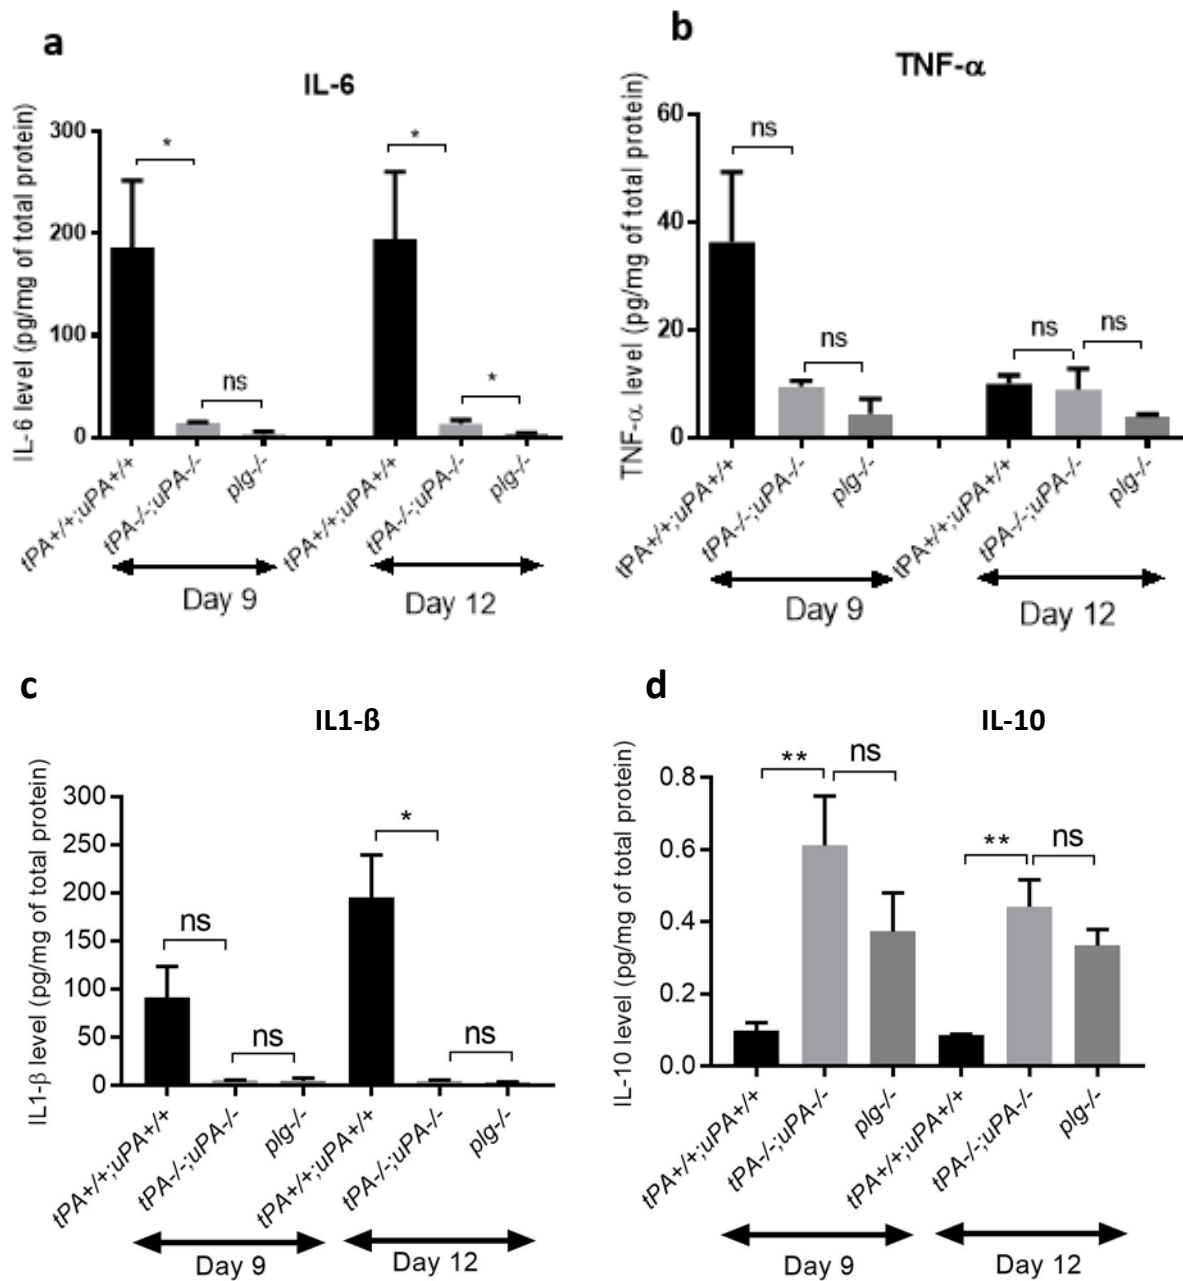

**Supplementary Fig. 11. Plasminogen activation is necessary to induce inflammation after irradiation.** Skin samples from WT, *tPA*<sup>-/-</sup>;*uPA*<sup>-/-</sup> and *plg*<sup>-/-</sup> mice were taken at different times after irradiation. Extracts were prepared and analyzed by ELISA (n ≥ 4 per time point). (a) IL-6 levels, (b) TNF-α levels, (c) IL-1-β levels and (d) IL-10 levels in the skin after irradiation.

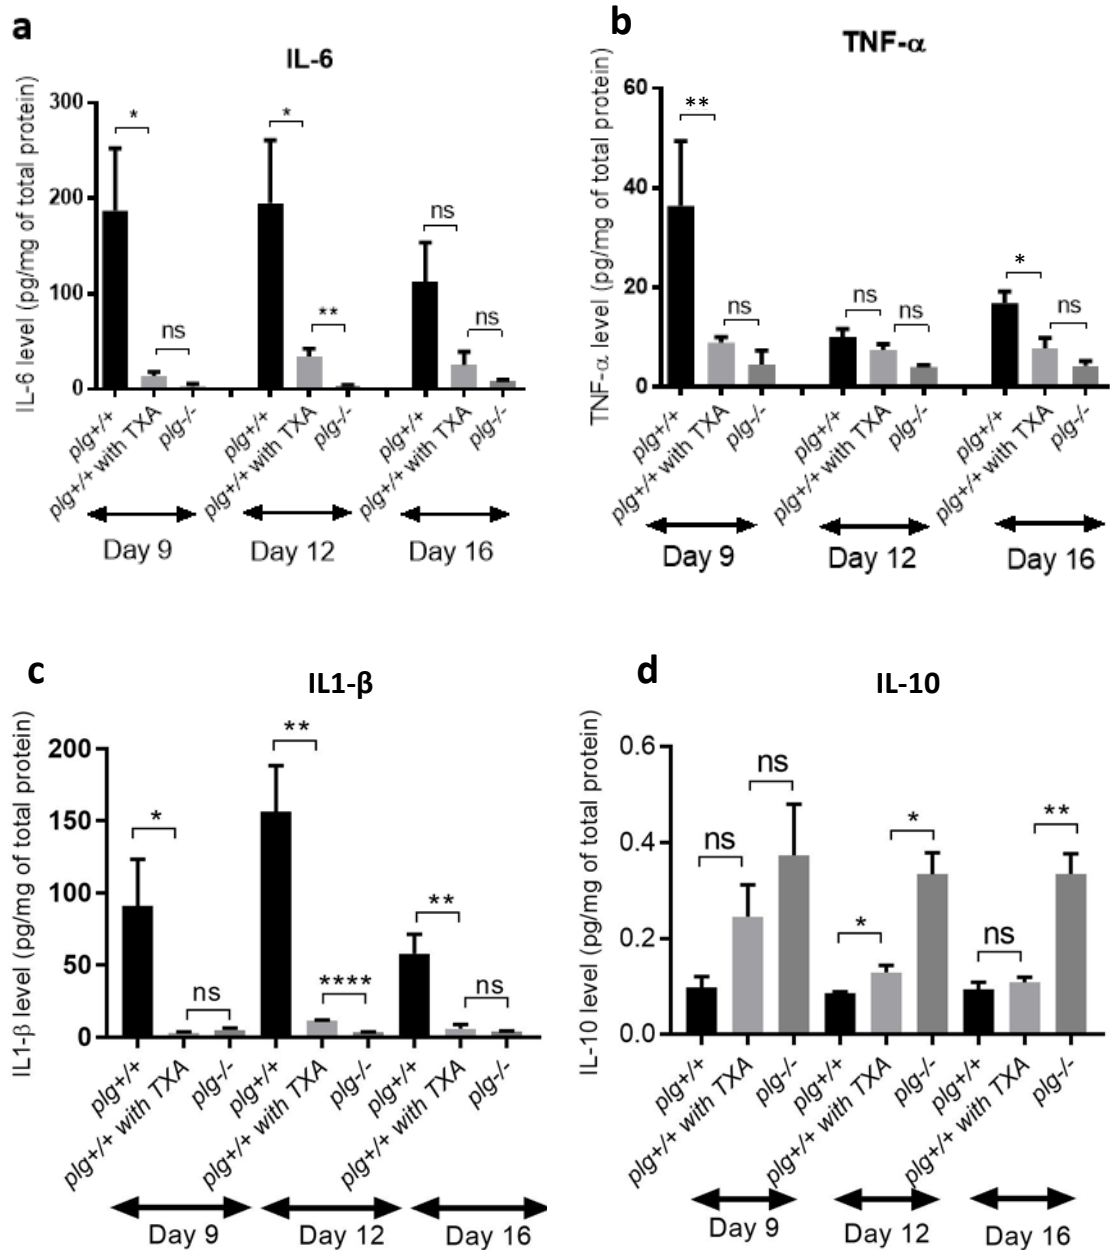

**a**

| Days after irradiation | Statistical significance between <i>plg+/+</i> and <i>plg+/+</i> with TXA |
|------------------------|---------------------------------------------------------------------------|
| Day 10                 | *                                                                         |
| Day 14                 | *                                                                         |
| Day 20                 | ns                                                                        |

**b**

| Days after irradiation | Statistical significance between <i>plg+/-</i> and <i>plg+/-</i> with TXA |
|------------------------|---------------------------------------------------------------------------|
| Day 10                 | **                                                                        |
| Day 14                 | *                                                                         |
| Day 20                 | ns                                                                        |

**Supplementary Table 1. Statistical analysis of skin scores in irradiated mice treated with TXA (Figure 6b and 6d).** (a) Statistical analysis of skin scores between *plg+/+* and *plg+/+* treated with TXA. (b) Statistical analysis of skin scores between *plg+/-* and *plg+/-* treated with TXA. \*  $p < 0.05$ . ns= not significant.
